# Supplementary material
Source: publisher figshare collection journal article supplement (https://sage.figshare.com/ndownloader/files/13023977)
Supplement: Supplementary file 1 [file 13023977]

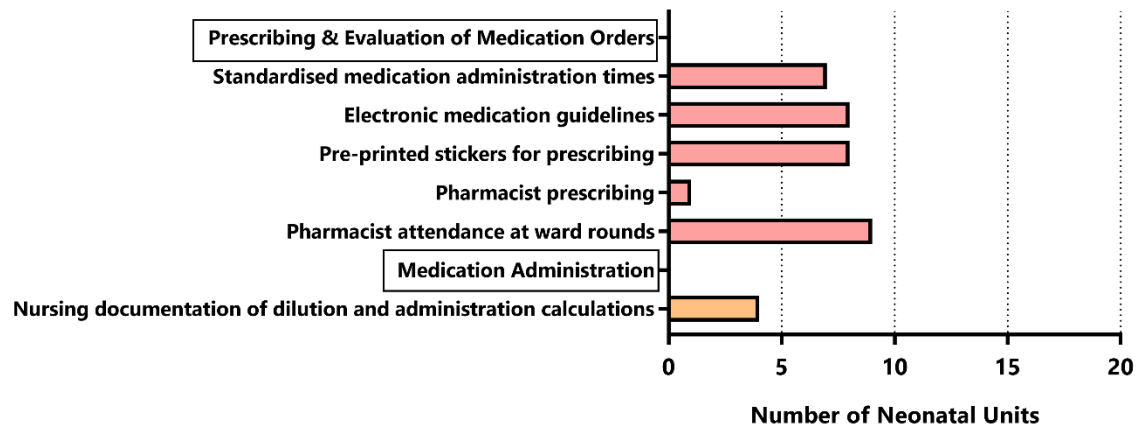

**Supplemental Figure 1. Utilisation of Additional Medication Error Prevention Strategies of Uncertain Efficacy by Australian and New Zealand Neonatal Intensive Care Units**
